# Supplementary material for: The Fast and the Furriest: Investigating the Rate of Selection on Mammalian Toxins
Source: MDPI journal article supplement (doi:10.3390/toxins14120842), 2022-12-01
Supplement: s1 [file s1]

# The Fast and the Furriest: Investigating the Rate of Selection on Mammalian Toxins

Leah Lucy Joscelyne Fitzpatrick, Vincent Nijman, Rodrigo Ligabue-Braun, K. Anne-Isola Nekaris

The following supplementary data includes details on the number of sequences used, full FEL, FUBAR and MEME results, all reported PAML results and significance of calculated LRTs, TreeSAAP results and model selection.

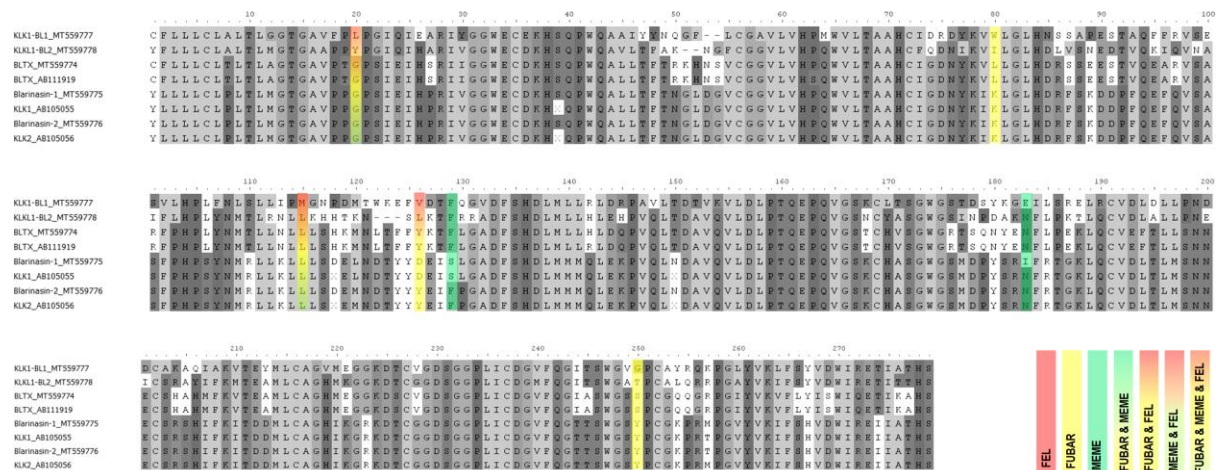

**Figure S1.** Amino acid alignment of KLK1 *Blarina*, with diversifying selection highlighted according to each programme. Red represents FEL, Yellow represents FUBAR and Green represents MEME. Overlapping sites with partial or complete programme agreement are colored as mixed hues.

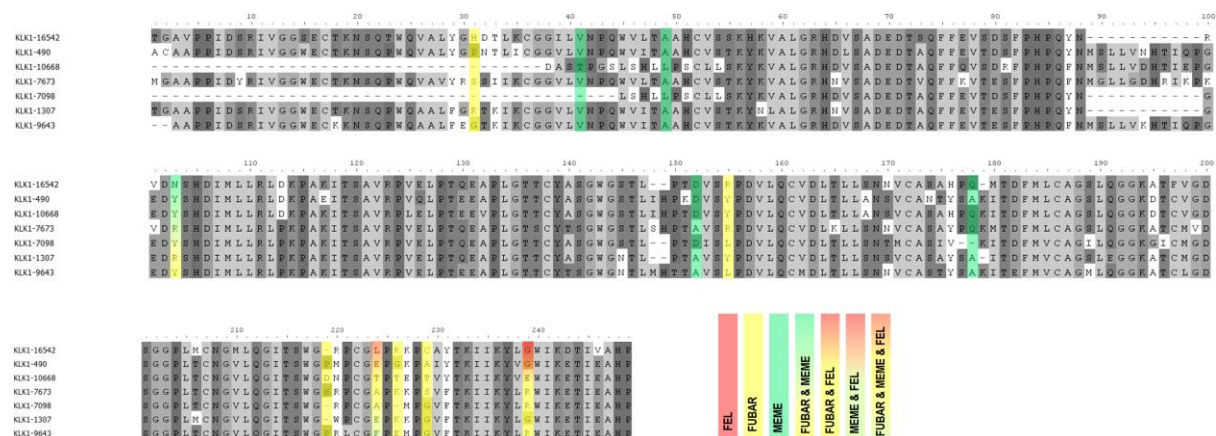

**Figure S2.** Amino acid alignment of KLK1 *Solenodon*, with diversifying selection highlighted according to each programme. Red represents FEL, Yellow represents FUBAR and Green represents MEME. Overlapping sites with partial or complete programme agreement are colored as mixed hues.

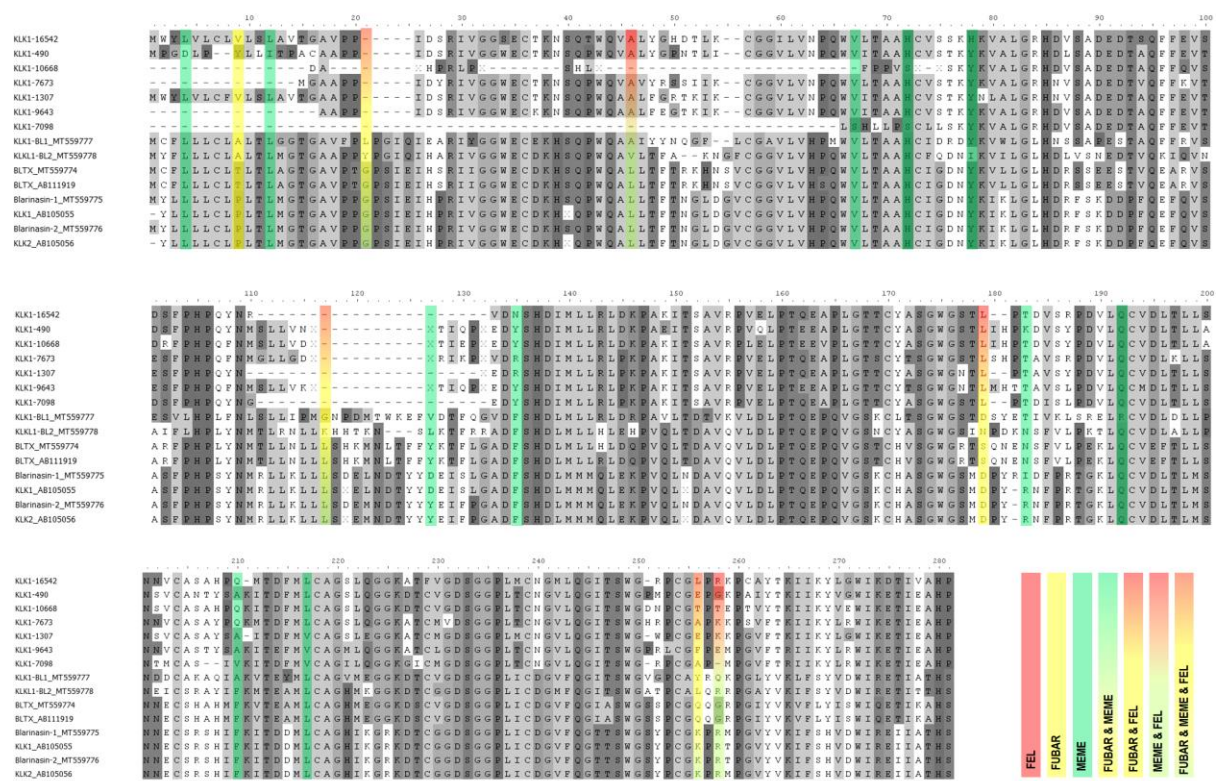

**Figure S3.** Amino acid alignment of KLK1 Eulipotyphla, with diversifying selection highlighted according to each programme. Red represents FEL, Yellow represents FUBAR and Green represents MEME. Overlapping sites with partial or complete programme agreement are colored as mixed hues.



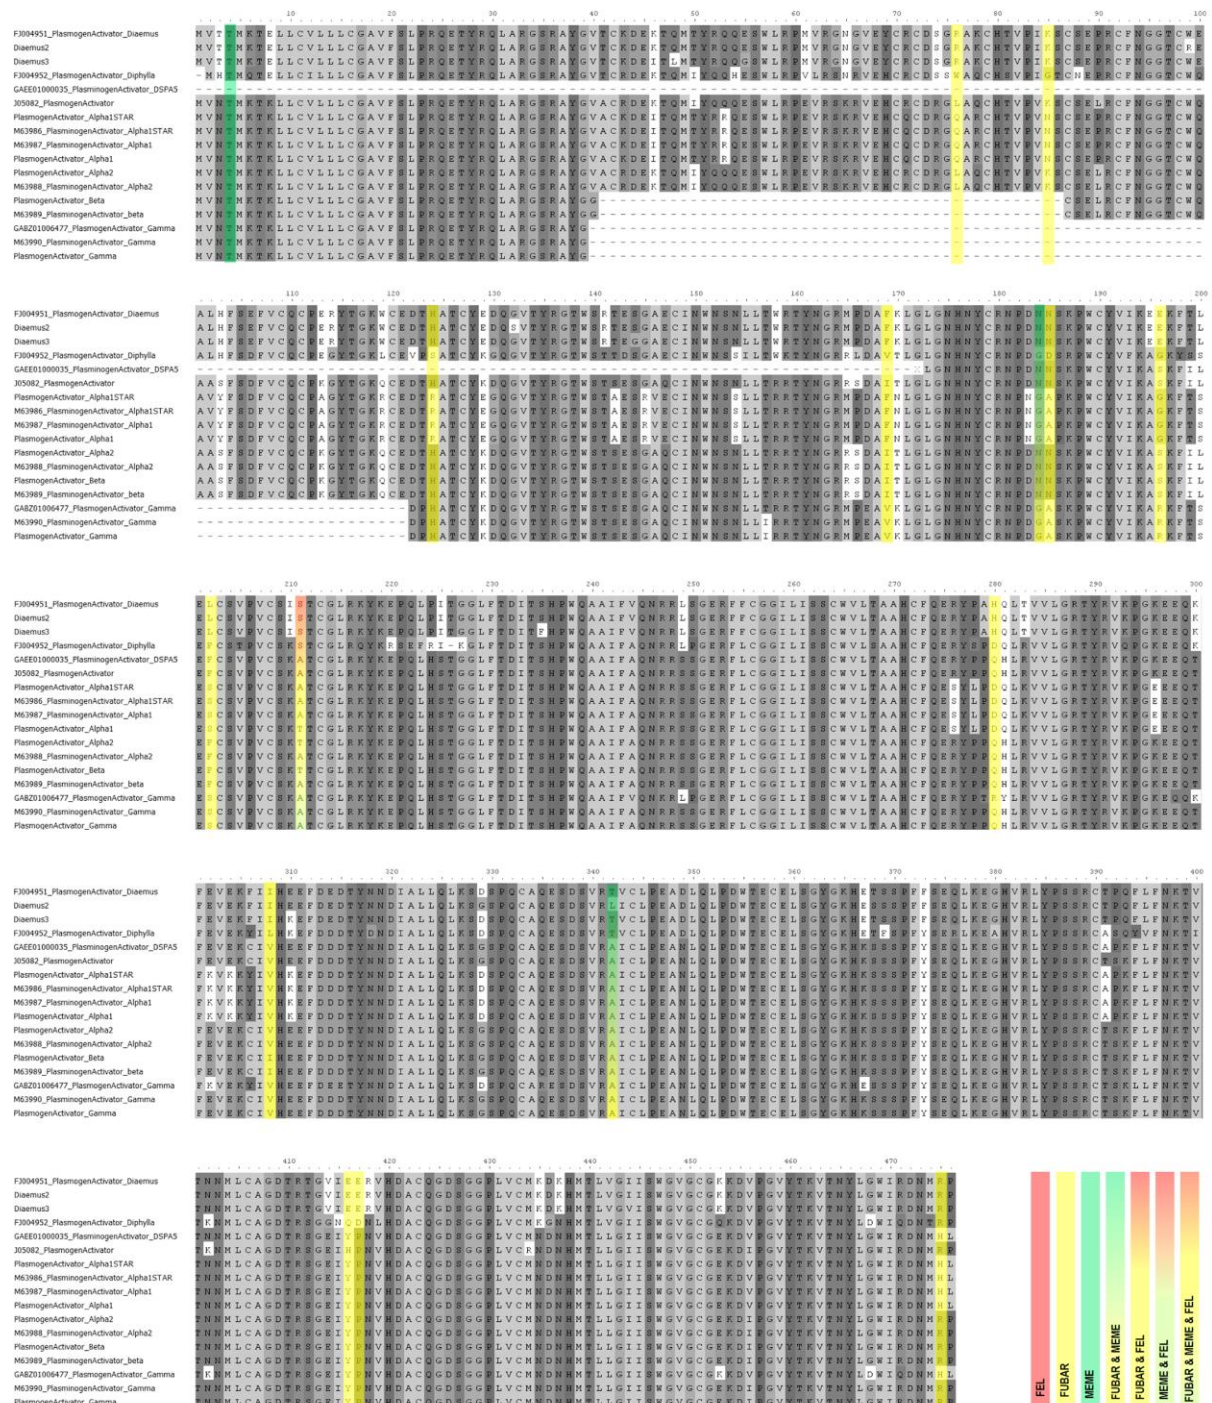

**Figure S4.** Amino acid alignment of Plasminogen Activator, with diversifying selection highlighted according to each programme. Red represents FEL, Yellow represents FUBAR and Green represents MEME. Overlapping sites with partial or complete programme agreement are colored as mixed hues.

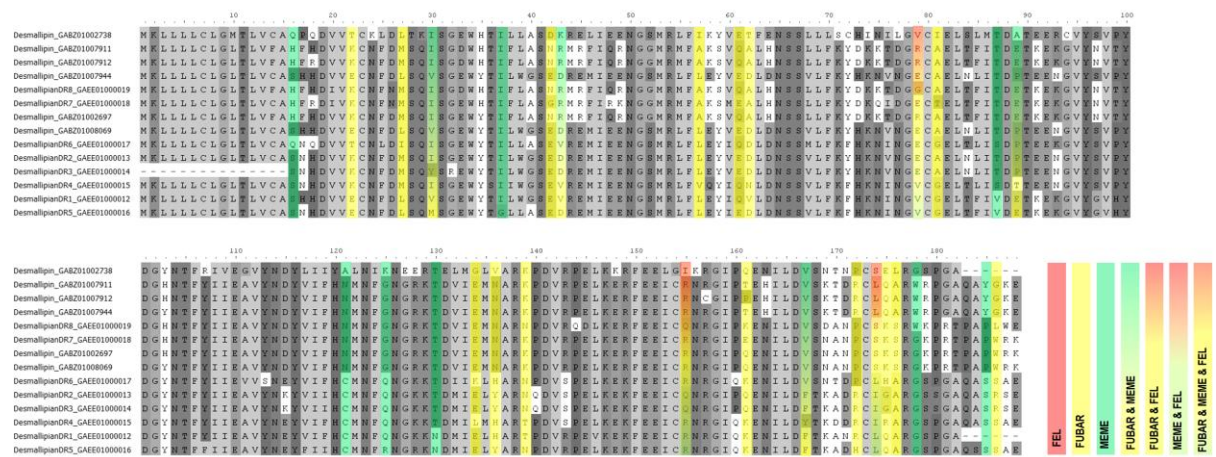

**Figure S5.** Amino acid alignment of Desmallipins, with diversifying selection highlighted according to each programme. Red represents FEL, Yellow represents FUBAR and Green represents MEME. Overlapping sites with partial or complete programme agreement are colored as mixed hues.

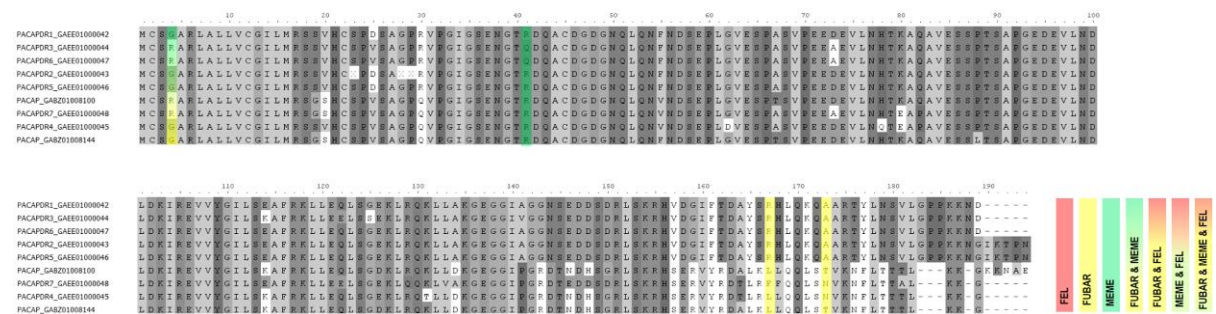

**Figure S6.** Amino acid alignment of PACAP, with diversifying selection highlighted according to each programme. Red represents FEL, Yellow represents FUBAR and Green represents MEME. Overlapping sites with partial or complete programme agreement are colored as mixed hues.

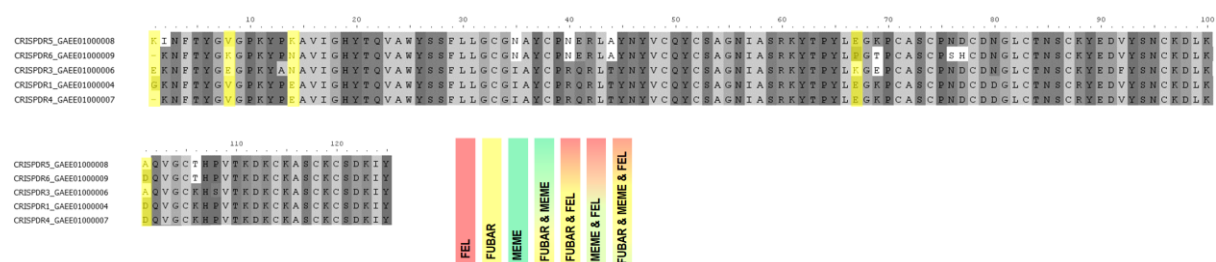

**Figure S7.** Amino acid alignment of CRiSP *Desmodus*, with diversifying selection highlighted according to each programme. Red represents FEL, Yellow represents FUBAR and Green represents MEME. Overlapping sites with partial or complete programme agreement are colored as mixed hues.



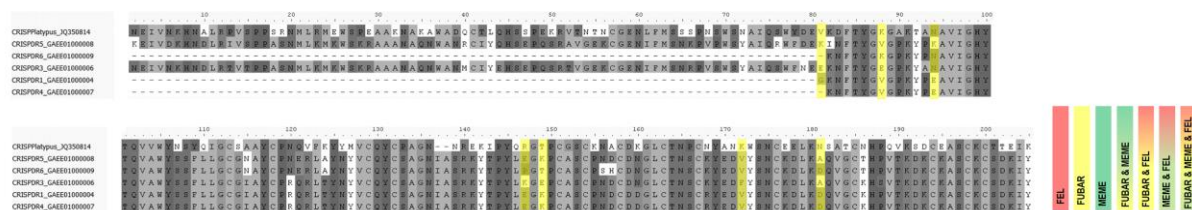

**Figure S8.** Amino acid alignment of CRiSP *Desmodus* and *Ornithorhynchus*, with diversifying selection highlighted according to each programme. Red represents FEL, Yellow represents FUBAR and Green represents MEME. Overlapping sites with partial or complete programme agreement are colored as mixed hues.

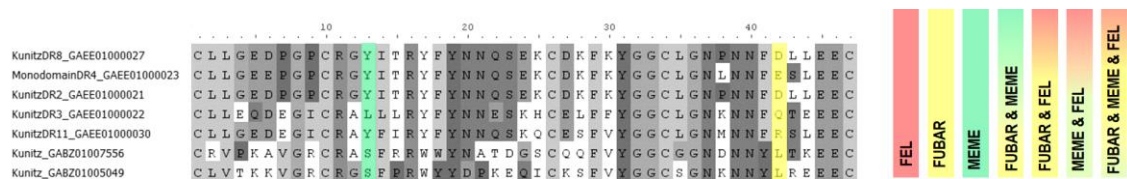

**Figure S9.** Amino acid alignment of Kunitz Domain One, with diversifying selection highlighted according to each programme. Red represents FEL, Yellow represents FUBAR and Green represents MEME. Overlapping sites with partial or complete programme agreement are colored as mixed hues.

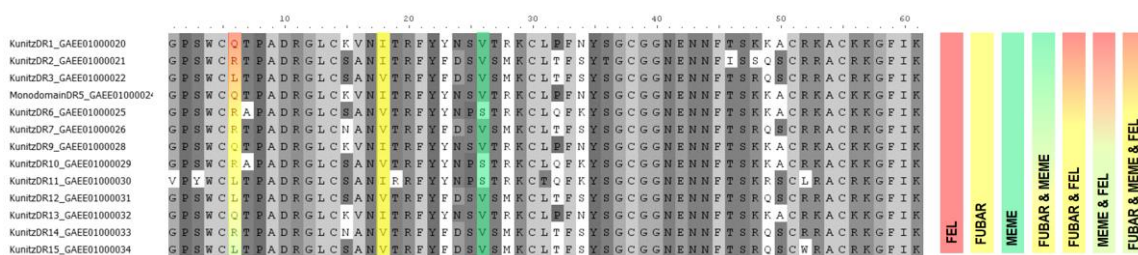

**Figure S10.** Amino acid alignment of Kunitz Domain Two, with diversifying selection highlighted according to each programme. Red represents FEL, Yellow represents FUBAR and Green represents MEME. Overlapping sites with partial or complete programme agreement are colored as mixed hues.

Table S1: The number of sequences and length of each alignment. Length of alignment does not include STOP codons, which were removed prior to analysis. Each alignment is included within Appendix 1.

| Toxin name                                                                          | Number of sequences | Length of alignment after TrimAI | Species present                                                                                                                                                |
|-------------------------------------------------------------------------------------|---------------------|----------------------------------|----------------------------------------------------------------------------------------------------------------------------------------------------------------|
| Kallikren-1(KLK1) <i>Blarina</i>                                                    | 8                   | 837                              | Short tailed shrew ( <i>Blarina brevicauda</i> )                                                                                                               |
| Kallikren-1(KLK1) <i>Solenodon</i>                                                  | 7                   | 747                              | Hispaniolan solenodon ( <i>Solenodon paradoxus</i> )                                                                                                           |
| Kallikrein-1 (KLK1) Eulipotyphla                                                    | 15                  | 843                              | Short tailed shrew ( <i>Blarina brevicauda</i> )<br>Hispaniolan solenodon ( <i>Solenodon paradoxus</i> )                                                       |
| Kallikren-1 (KLK1) All                                                              | 16                  | 789                              | Short tailed shrew ( <i>Blarina brevicauda</i> )<br>Hispaniolan solenodon ( <i>Solenodon paradoxus</i> )<br>Common Vampire Bat ( <i>Desmodus rotundus</i> )    |
| Plasminogen Activator                                                               | 17                  | 1428                             | Hairy legged vampire bat ( <i>Diphylla ecaudata</i> )<br>White winged vampire bat ( <i>Diaemus youngi</i> )<br>Common vampire bat ( <i>Desmodus rotundus</i> ) |
| Desmallipins ( <i>Desmodus</i> allergen-related lipocalins)                         | 14                  | 564                              | Common Vampire Bat ( <i>Desmodus rotundus</i> )                                                                                                                |
| PACAP (Pituitary Adenylate Cyclase-Activating Polypeptide)                          | 9                   | 582                              | Common Vampire Bat ( <i>Desmodus rotundus</i> )                                                                                                                |
| Cysteine-rich secretory proteins (CRiSP) <i>Desmodus</i>                            | 5                   | 375                              | Common Vampire Bat ( <i>Desmodus rotundus</i> )                                                                                                                |
| Cysteine-rich secretory proteins (CRiSP) <i>Desmodus</i> and <i>Ornithorhynchus</i> | 6                   | 615                              | Common Vampire Bat ( <i>Desmodus rotundus</i> )<br>Platypus ( <i>Ornithorhynchus anatinus</i> )                                                                |
| Kunitz Domain One                                                                   | 7                   | 141                              | Common Vampire Bat ( <i>Desmodus rotundus</i> )                                                                                                                |
| Kunitz Domain Two                                                                   | 13                  | 183                              | Common Vampire Bat ( <i>Desmodus rotundus</i> )                                                                                                                |

Table S2: FEL results for each alignment including number of sites identified to be under significant diversifying or purifying selection and at which site in each alignment.

| Toxin                                 | Species                                                                                                                                                                      | Sites identified under diversifying selection | Sites number               | Sites identified under purifying selection | Sites number                                                                                                                                                                                                               |
|---------------------------------------|------------------------------------------------------------------------------------------------------------------------------------------------------------------------------|-----------------------------------------------|----------------------------|--------------------------------------------|----------------------------------------------------------------------------------------------------------------------------------------------------------------------------------------------------------------------------|
| Kallikren-1(KLK1)<br><i>Blarina</i>   | Short tailed shrew<br>( <i>Blarina brevicauda</i> )                                                                                                                          | 3                                             | 20, 116, 126               | 26                                         | 13, 14, 23, 29, 38, 39, 83, 94, 104, 136, 146, 150, 151, 160, 173, 175, 191, 199, 202, 209, 211, 216, 224, 233, 238, 267                                                                                                   |
| Kallikren-1(KLK1)<br><i>Solenodon</i> | Hispaniolan solenodon<br>( <i>Solenodon paradoxus</i> )                                                                                                                      | 2                                             | 224, 239                   | 19                                         | 16, 21, 52, 53, 75, 76, 86, 104, 118, 139, 144, 154, 166, 186, 192, 196, 204, 223, 228                                                                                                                                     |
| Kallikrein-1 (KLK1)<br>Eulipotyphla   | Short tailed shrew<br>( <i>Blarina brevicauda</i> )<br><br>Hispaniolan solenodon<br>( <i>Solenodon paradoxus</i> )                                                           | 6                                             | 21, 46, 117, 179, 256, 258 | 47                                         | 2,6,15,17,24,26, 29,32,35,38,39, 40,61,66,73,85, 95,105,107,134, 136,137,147,15 1,153,161,171,1 74,176,193,198, 201,204,211,21 3,218,224,226,2 28,235,236,239, 241,244,260,27 7,280                                        |
| Kallikren-1 (KLK1)<br>All             | Short tailed shrew<br>( <i>Blarina brevicauda</i> )<br><br>Hispaniolan solenodon<br>( <i>Solenodon paradoxus</i> )<br><br>Common Vampire Bat<br>( <i>Desmodus rotundus</i> ) | 4                                             | 83, 179, 238, 240          | 48                                         | 2, 6, 17, 21, 25, 27, 30, 33, 34, 35, 50, 53, 54, 59, 66, 78, 88, 98, 100, 116, 118, 119, 129, 133, 135, 143, 153, 156, 158, 175, 180, 183, 186, 193, 195, 200, 206, 208, 210, 218, 221, 223, 226, 232, 235, 242, 259, 262 |

|                                                                                     |                                                                                                                                                                                     |   |              |    |                                                                                                          |
|-------------------------------------------------------------------------------------|-------------------------------------------------------------------------------------------------------------------------------------------------------------------------------------|---|--------------|----|----------------------------------------------------------------------------------------------------------|
| Plasminogen Activator                                                               | <p>Hairy legged vampire bat<br/>(<i>Diphylla ecaudata</i>)</p> <p>White winged vampire bat<br/>(<i>Diaemus youngi</i>)</p> <p>Common vampire bat<br/>(<i>Desmodus rotundus</i>)</p> | 1 | 211          | 22 | 44, 73, 79, 83, 128, 135, 153, 154, 179, 257, 258, 259, 307, 311, 344, 363, 381, 392, 420, 455, 465, 473 |
| Desmallipins<br>( <i>Desmodus</i> allergen-related lipocalins)                      | Common Vampire Bat<br>( <i>Desmodus rotundus</i> )                                                                                                                                  | 3 | 79, 155, 174 | 13 | 19, 41, 64, 65, 73, 83, 88, 105, 118, 151, 158, 173, 180                                                 |
| PACAP (Pituitary Adenylate Cyclase-Activating Polypeptide)                          | Common Vampire Bat<br>( <i>Desmodus rotundus</i> )                                                                                                                                  | 0 | N/A          | 10 | 66, 81, 92, 99, 144, 163, 186, 187, 189, 193                                                             |
| Cysteine-rich secretory proteins (CRiSP) <i>Desmodus</i>                            | Common Vampire Bat<br>( <i>Desmodus rotundus</i> )                                                                                                                                  | 0 | N/A          | 3  | 6, 11, 42                                                                                                |
| Cysteine-rich secretory proteins (CRiSP) <i>Desmodus</i> and <i>Ornithorhynchus</i> | Common Vampire Bat<br>( <i>Desmodus rotundus</i> )<br>Platypus<br>( <i>Ornithorhynchus anatinus</i> )                                                                               | 0 | N/A          | 19 | 2, 7, 60, 75, 86, 91, 99, 100, 117, 129, 131, 135, 153, 162, 163, 187, 194, 199, 200                     |
| Kunitz Domain One                                                                   | Common Vampire Bat<br>( <i>Desmodus rotundus</i> )                                                                                                                                  | 0 | N/A          | 12 | 16, 19, 29, 31, 33, 34, 37, 39, 40, 45, 46, 47                                                           |



|                      |                                                              |   |   |   |       |
|----------------------|--------------------------------------------------------------|---|---|---|-------|
| Kunitz Domain<br>Two | Common<br>Vampire<br>Bat<br>( <i>Desmodus<br/>rotundus</i> ) | 1 | 6 | 2 | 8, 17 |
|----------------------|--------------------------------------------------------------|---|---|---|-------|

Table S3: FUBAR results for each alignment including number of sites identified to be under significant diversifying or purifying selection and at which site in each alignment.

| Toxin                                 | Species                                                                                                                                                                      | Sites identified under diversifying selection | Sites number                                   | Sites identified under purifying selection | Sites number                                                                                                                                                                                                                                                     |
|---------------------------------------|------------------------------------------------------------------------------------------------------------------------------------------------------------------------------|-----------------------------------------------|------------------------------------------------|--------------------------------------------|------------------------------------------------------------------------------------------------------------------------------------------------------------------------------------------------------------------------------------------------------------------|
| Kallikren-1(KLK1)<br><i>Blarina</i>   | Short tailed shrew<br>( <i>Blarina brevicauda</i> )                                                                                                                          | 5                                             | 20, 80, 116,<br>126, 250                       | 23                                         | 13, 14, 19, 23,<br>38, 39, 83, 100,<br>104, 146, 150,<br>151, 152, 173,<br>199, 202, 209,<br>211, 216, 224,<br>233, 238, 267                                                                                                                                     |
| Kallikren-1(KLK1)<br><i>Solenodon</i> | Hispaniolan solenodon<br>( <i>Solenodon paradoxus</i> )                                                                                                                      | 8                                             | 31, 103, 155,<br>219, 224,<br>226, 229,<br>239 | 16                                         | 16, 21, 53, 76,<br>86, 96, 104,<br>137, 154, 166,<br>186, 192, 196,<br>204, 223, 228                                                                                                                                                                             |
| Kallikrein-1 (KLK1)<br>Eulipotyphla   | Short tailed shrew<br>( <i>Blarina brevicauda</i> )<br><br>Hispaniolan solenodon<br>( <i>Solenodon paradoxus</i> )                                                           | 5                                             | 9, 21, 117,<br>179, 256                        | 35                                         | 6, 15, 17, 24,<br>32, 35, 39, 40,<br>61, 73, 85, 95,<br>105, 107, 134,<br>136, 137, 147,<br>151, 153, 171,<br>174, 176, 198,<br>201, 204, 211,<br>213, 218, 224,<br>226, 228, 236,<br>244, 260,                                                                  |
| Kallikren-1 (KLK1)<br>All             | Short tailed shrew<br>( <i>Blarina brevicauda</i> )<br><br>Hispaniolan solenodon<br>( <i>Solenodon paradoxus</i> )<br><br>Common Vampire Bat<br>( <i>Desmodus rotundus</i> ) | 3                                             | 169, 179,<br>238                               | 47                                         | 2, 17, 20, 21,<br>25, 27, 30, 33,<br>34, 35, 53, 54,<br>59, 66, 67, 78,<br>88, 98, 100,<br>116, 118, 119,<br>129, 133, 135,<br>153, 156, 158,<br>163, 180, 183,<br>186, 193, 195,<br>200, 206, 208,<br>210, 218, 221,<br>223, 226, 232,<br>235, 242, 259,<br>262 |

|                                                            |                                                                                                                                                                                 |    |                                                                                                   |   |                                        |
|------------------------------------------------------------|---------------------------------------------------------------------------------------------------------------------------------------------------------------------------------|----|---------------------------------------------------------------------------------------------------|---|----------------------------------------|
| Plasminogen Activator                                      | Hairy legged vampire bat<br>( <i>Diphylla ecaudata</i> )<br><br>White winged vampire bat<br>( <i>Diaemus youngi</i> )<br><br>Common vampire bat<br>( <i>Desmodus rotundus</i> ) | 15 | 76, 85, 124, 169, 184, 185, 196, 202, 211, 280, 308, 342, 416, 417, 475                           | 8 | 154, 179, 257, 258, 311, 344, 368, 392 |
| Desmallipins (Desmodus allergen-related lipocalins)        | Common Vampire Bat<br>( <i>Desmodus rotundus</i> )                                                                                                                              | 22 | 22, 27, 30, 42, 43, 57, 61, 62, 79, 81, 89, 134, 136, 139, 155, 161, 167, 172, 174, 175, 176, 186 | 8 | 19, 64, 73, 88, 105, 118, 170, 184     |
| PACAP (Pituitary Adenylate Cyclase-Activating Polypeptide) | Common Vampire Bat<br>( <i>Desmodus rotundus</i> )                                                                                                                              | 3  | 4, 167, 173                                                                                       | 5 | 66, 81, 99, 144, 189                   |
| Cysteine-rich secretory proteins (CRiSP) <i>Desmodus</i>   | Common Vampire Bat<br>( <i>Desmodus rotundus</i> )                                                                                                                              | 5  | 1, 8, 14, 67, 101                                                                                 | 2 | 6, 11                                  |
| Cysteine-rich secretory proteins (CRiSP) All               | Common Vampire Bat<br>( <i>Desmodus rotundus</i> )<br><br>Platypus<br>( <i>Ornithorhynchus anatinus</i> )                                                                       | 7  | 81, 88, 94, 147, 149, 172, 181                                                                    | 2 | 91, 133                                |

|                                   |                                                              |   |       |   |                               |
|-----------------------------------|--------------------------------------------------------------|---|-------|---|-------------------------------|
| Kunitz Domain<br>One              | Common<br>Vampire<br>Bat<br>( <i>Desmodus<br/>rotundus</i> ) | 1 | 42    | 7 | 16, 29, 31, 33,<br>37, 39, 40 |
| Kunitz Domain<br>Two (Chiroptera) | Common<br>Vampire<br>Bat<br>( <i>Desmodus<br/>rotundus</i> ) | 2 | 6, 18 | 1 | 8                             |



Table S4: MEME results for each alignment including number of sites identified to be under significant diversifying selection and at which site in each alignment.

| Toxin                                               | Species                                                                                                                                                                | Sites identified under positive selection | Sites number                                                                                | dN/dS |
|-----------------------------------------------------|------------------------------------------------------------------------------------------------------------------------------------------------------------------------|-------------------------------------------|---------------------------------------------------------------------------------------------|-------|
| Kallikren-1(KLK1)<br><i>Blarina</i>                 | Short tailed shrew ( <i>Blarina brevicauda</i> )                                                                                                                       | 4                                         | 20, 116, 129, 183                                                                           | 0.619 |
| Kallikren-1(KLK1)<br><i>Solenodon</i>               | Hispaniolan solenodon ( <i>Solenodon paradoxus</i> )                                                                                                                   | 6                                         | 41, 49, 103, 152, 178, 224                                                                  | 0.751 |
| Kallikrein-1 (KLK1)<br>Eulipotyphla                 | Short tailed shrew ( <i>Blarina brevicauda</i> )<br><br>Hispaniolan solenodon ( <i>Solenodon paradoxus</i> )                                                           | 16                                        | 4, 12, 21, 46, 67, 72, 78, 117, 127, 135, 183, 197, 210, 217, 256, 258,                     | 0.593 |
| Kallikren-1 (KLK1) All                              | Short tailed shrew ( <i>Blarina brevicauda</i> )<br><br>Hispaniolan solenodon ( <i>Solenodon paradoxus</i> )<br><br>Common Vampire Bat ( <i>Desmodus rotundus</i> )    | 21                                        | 5, 10, 55, 58, 60, 61, 62, 65, 71, 74, 86, 109, 117, 138, 165, 179, 192, 199, 236, 238, 240 | 0.513 |
| Plasminogen Activator                               | Hairy legged vampire bat ( <i>Diphylla ecaudata</i> )<br><br>White winged vampire bat ( <i>Diaemus youngi</i> )<br><br>Common vampire bat ( <i>Desmodus rotundus</i> ) | 4                                         | 40, 184, 211, 342                                                                           | 1.04  |
| Desmallipins (Desmodus allergen-related lipocalins) | Common Vampire Bat ( <i>Desmodus rotundus</i> )                                                                                                                        | 15                                        | 16, 30, 37, 43, 79, 87, 89, 121, 125, 130, 155, 167, 174, 178, 185                          | 1.18  |

|                                                             |                                                                                                     |   |       |                  |
|-------------------------------------------------------------|-----------------------------------------------------------------------------------------------------|---|-------|------------------|
| PACAP (Pituitary Adenylate Cyclase-Activating Polypeptide ) | Common Vampire Bat ( <i>Desmodus rotundus</i> )                                                     | 2 | 4, 41 | 1.04             |
| Cysteine-rich secretory proteins (CRiSP) <i>Desmodus</i>    | Common Vampire Bat ( <i>Desmodus rotundus</i> )                                                     | 0 | N/A   | $\omega = 1.62$  |
| Cysteine-rich secretory proteins (CRiSP) All                | Common Vampire Bat ( <i>Desmodus rotundus</i> )<br><br>Platypus ( <i>Ornithorhynchus anatinus</i> ) | 0 | N/A   | $\omega = 0.482$ |
| Kunitz Domain One                                           | Common Vampire Bat ( <i>Desmodus rotundus</i> )                                                     | 1 | 13    | $\omega = 0.444$ |
| Kunitz Domain Two (Chiroptera)                              | Common Vampire Bat ( <i>Desmodus rotundus</i> )                                                     | 2 | 6, 26 | $\omega = 2.51$  |

Table S5: CodeML results for the alignment of KLK1 *Blarina brevicauda*, including results of all models identified in this study.

| Model                                                                                                                   | Likelihood   | dN/dS   | Parameters            |                       |                     |                       |          | Number of sites where omega > 1*                                                                                |
|-------------------------------------------------------------------------------------------------------------------------|--------------|---------|-----------------------|-----------------------|---------------------|-----------------------|----------|-----------------------------------------------------------------------------------------------------------------|
| M0 (Null)                                                                                                               | -2742.182956 | 0.57984 | N/A                   |                       |                     |                       |          | N/A                                                                                                             |
| M1a (Neutral)                                                                                                           | -2700.342314 | 0.5481  | P0: 0.482<br>ω0: 0.06 |                       | P1: 0.518<br>ω1:1.0 |                       |          | N/A                                                                                                             |
| M2a†                                                                                                                    | -2694.060310 | 0.8139  | P0: 0.522<br>ω0: 0.11 | P1: 0.324<br>ω1: 1.0  |                     | P2: 0.154<br>ω2: 2.81 |          | None                                                                                                            |
| M3†                                                                                                                     | -2693.831198 | 0.8055  | P0: 0.288<br>ω0: 0.0  | P1: 0.484<br>ω1: 0.51 |                     | P2: 0.227<br>ω2: 2.45 |          | N/A                                                                                                             |
| M7 (beta)                                                                                                               | -2701.596702 | 0.5558  | p: 0.10166            |                       |                     |                       |          | N/A                                                                                                             |
|                                                                                                                         |              |         | q: 0.08126            |                       |                     |                       |          |                                                                                                                 |
| M8 (beta and ω)†                                                                                                        | -2693.907033 | 0.8075  | p0: 0.804             | P = 0.380             | q = 0.629           | P1 = 0.196            | ω = 2.58 | 13 (P>0.95)<br>(12, 20, 49, 84, 90, 111, 113, 117, 136, 172, 240, 244, 247)<br><br>3 (P>0.99)<br>(75, 121, 171) |
| M8a†                                                                                                                    | -2700.358698 | 0.5481  | p0: 0.482             | P = 6.81              | q = 99              | P1 = 0.517            | ω = 1.00 | N/A                                                                                                             |
| † Models that allow ω > 1 (checking for diversifying selection)<br>*identified by the Bayes Empirical Bayes (BEB) model |              |         |                       |                       |                     |                       |          |                                                                                                                 |

Table S6: Significance of CodeML results for the alignment of KLK1 *Blarina brevicauda*

| Null model vs Alternative model |     | X2 result | K result | Level of significance      |
|---------------------------------|-----|-----------|----------|----------------------------|
| M0                              | M3  | 96.7      | 4        | P < 0.001<br>(0.000000000) |
| M1a                             | M2a | 12.6      | 2        | P < 0.001<br>(0.001869650) |
| M7                              | M8  | 15.4      | 2        | P < 0.001<br>(0.000457530) |
| M8a                             | M8  | 12.9      | 1        | P < 0.001<br>(0.000327998) |

Table S7: CodeML results for the alignment of KLK1 *Solenodon paradoxus*, including results of all models identified in this study.

| Model               | Likelihood   | dN/dS   | Parameters             |                       |                       |               |                                               | Number of sites<br>where omega > 1*                          |
|---------------------|--------------|---------|------------------------|-----------------------|-----------------------|---------------|-----------------------------------------------|--------------------------------------------------------------|
| M0 (Null)           | -1825.959506 | 0.58254 | N/A                    |                       |                       |               |                                               | N/A                                                          |
| M1a<br>(Neutral)    | -1794.224892 | 0.4647  | P0: 0.555<br>ω0: 0.04  |                       | P1: 0.445<br>ω1:1.0   |               |                                               | N/A                                                          |
| M2a†                | -1783.399757 | 0.7298  | P0: 0.483<br>ω0: 0.005 | P1 0.473<br>ω1: 1.0   | P2: 0.044<br>ω2: 5.85 |               | 1 (P>0.95)<br>(48)<br>2 (P>0.99)<br>(98, 163) |                                                              |
| M3†                 | -1783.295718 | 0.7002  | P0: 0.462<br>ω0: 0.000 | P1: 0.487<br>ω1: 0.89 | P2: 0.05<br>ω2: 5.25  |               | N/A                                           |                                                              |
| M7 (beta)           | -1794.457015 | 0.4416  | p: 0.01396             |                       |                       |               |                                               | N/A                                                          |
|                     |              |         | q: 0.01724             |                       |                       |               |                                               |                                                              |
| M8 (beta<br>and ω)† | -1783.338167 | 0.7073  | p0:<br>0.954           | P =<br>0.04           | q =<br>0.05           | P1 =<br>0.05  | ω =<br>5.55                                   | 2 (P>0.95)<br>(119, 167)<br>4 (P>0.99)<br>(48, 98, 163, 177) |
| M8a†                | -1794.201112 | 0.4615  | p0:<br>0.565           | P =<br>0.137          | q =<br>1.96           | P1 =<br>0.435 | ω =<br>1.0                                    | N/A                                                          |

† Models that allow  $\omega > 1$  (checking for diversifying selection)

\*identified by the Bayes Empirical Bayes (BEB) model

Table S6: Significance of CodeML results for the alignment of KLK1 *Solenodon paradoxus*

| Null model vs Alternative model |     | X2 result | K result | Level of significance      |
|---------------------------------|-----|-----------|----------|----------------------------|
| M0                              | M3  | 85        | 4        | P < 0.001<br>(0.000000000) |
| M1a                             | M2a | 21.7      | 2        | P < 0.001<br>(0.000019893) |
| M7                              | M8  | 22.2      | 2        | P < 0.001<br>(0.000014830) |
| M8a                             | M8  | 21.7      | 1        | P < 0.001<br>(0.000003145) |



| Table S9: CodeML results for the alignment of KLK1 Eulipotyphla, including results of all models identified in this study. |              |         |                        |                      |                     |                      |          |                                                         |
|----------------------------------------------------------------------------------------------------------------------------|--------------|---------|------------------------|----------------------|---------------------|----------------------|----------|---------------------------------------------------------|
| Model                                                                                                                      | Likelihood   | dN/dS   | Parameters             |                      |                     |                      |          | Number of sites where omega > 1*                        |
| M0 (Null)                                                                                                                  | -3254.134397 | 0.49379 | N/A                    |                      |                     |                      |          | N/A                                                     |
| M1a (Neutral)                                                                                                              | -3181.163308 | 0.5066  | P0: 0.569<br>ω0: 0.13  |                      | P1: 0.430<br>ω1:1.0 |                      |          | N/A                                                     |
| M2a†                                                                                                                       | -3167.738986 | 0.6748  | P0: 0.533<br>ω0: 0.132 | P1: 0.436<br>ω1: 1.0 |                     | P2: 0.03<br>ω2: 5.60 |          | 1 (P>0.95)<br>(90)<br>2 (P>0.99)<br>(111, 155)          |
| M3†                                                                                                                        | -3167.735906 | 0.6713  | P0: 0.530<br>ω0: 0.13  | P1 0.440<br>ω1: 0.99 |                     | P2:0.03<br>ω2: 5.53  |          | N/A                                                     |
| M7 (beta)                                                                                                                  | -3181.985664 | 0.4700  | p: 0.36708             |                      |                     |                      |          | N/A                                                     |
|                                                                                                                            |              |         | q: 0.41393             |                      |                     |                      |          |                                                         |
| M8 (beta and ω)†                                                                                                           | -3167.205706 | 0.6260  | p0: 0.963              | P = 0.392            | q = 0.44            | P1 = 0.04            | ω = 4.69 | 3 (P>0.95)<br>(87, 90, 151)<br>2 (P>0.99)<br>(111, 155) |
| M8a†                                                                                                                       | -3179.158058 | 0.4761  | p0: 0.641              | P = 0.856            | q = 3.60            | P1 = 0.36            | ω = 1    | N/A                                                     |
| † Models that allow ω > 1 (checking for diversifying selection)<br>*identified by the Bayes Empirical Bayes (BEB) model    |              |         |                        |                      |                     |                      |          |                                                         |

| Table S10: Significance of CodeML results for the alignment of KLK1 Eulipotyphla |     |           |          |                            |
|----------------------------------------------------------------------------------|-----|-----------|----------|----------------------------|
| Null model vs Alternative model                                                  |     | X2 result | K result | Level of significance      |
| M0                                                                               | M3  | 172.8     | 4        | P < 0.001<br>(0.000000000) |
| M1a                                                                              | M2a | 26.9      | 2        | P < 0.001<br>(0.000001479) |
| M7                                                                               | M8  | 29.6      | 2        | P < 0.001<br>(0.000000381) |
| M8a                                                                              | M8  | 23.9      | 1        | P < 0.001<br>(0.000001012) |

| Table S11: CodeML results for the alignment of KLK1 All, including results of all models identified in this study. |              |         |                       |                      |                      |            |                      |                                               |
|--------------------------------------------------------------------------------------------------------------------|--------------|---------|-----------------------|----------------------|----------------------|------------|----------------------|-----------------------------------------------|
| Model                                                                                                              | Likelihood   | dN/dS   | Parameters            |                      |                      |            |                      | Number of sites where omega > 1*              |
| M0 (Null)                                                                                                          | -2982.511043 | 0.43905 | N/A                   |                      |                      |            |                      | N/A                                           |
| M1a (Neutral)                                                                                                      | -2910.059147 | 0.5147  | P0: 0.545<br>ω0: 0.11 |                      | P1: 0.456<br>ω1:1.0  |            |                      | N/A                                           |
| M2a†                                                                                                               | -2904.636186 | 0.6339  | P0: 0.523<br>ω0: 0.11 |                      | P1: 0.436<br>ω1: 1.0 |            | P2: 0.04<br>ω2: 3.44 | 1 (P>0.95) (88)                               |
| M3†                                                                                                                | -2901.128891 | 0.5587  | P0: 0.222<br>ω0:0.0   | P0: 0.329<br>ω0:0.22 | P1: 0.397<br>ω1:0.85 |            | P2: 0.052<br>ω2:2.86 | N/A                                           |
| M7 (beta)                                                                                                          | -2908.090763 | 0.4537  | p: 0.32733            |                      |                      |            |                      | N/A                                           |
|                                                                                                                    |              |         | q: 0.39411            |                      |                      |            |                      |                                               |
| M8 (beta and ω)†                                                                                                   | -2901.550405 | 0.5592  | p0: 0.949             | P = 0.364            | q = 0.474            | P1 = 0.05  | ω = 2.87             | 3 (P>0.95) (103, 108, 148)<br>1 (P>0.99) (88) |
| M8a†                                                                                                               | -2906.989456 | 0.4649  | p0 = 0.664            | P = 0.549            | q = 2.13             | P1 = 0.336 | ω = 1.00             | N/A                                           |
| † Models that allow ω > 1 (checking for diversifying selection)                                                    |              |         |                       |                      |                      |            |                      |                                               |
| *identified by the Bayes Empirical Bayes (BEB) model                                                               |              |         |                       |                      |                      |            |                      |                                               |

| Table S12: Significance of CodeML results for the alignment of KLK1 All |     |           |          |                         |
|-------------------------------------------------------------------------|-----|-----------|----------|-------------------------|
| Null model vs Alternative model                                         |     | X2 result | K result | Level of significance   |
| M0                                                                      | M3  | 162.8     | 6        | P < 0.001 (0.000000000) |
| M1a                                                                     | M2a | 10.8      | 2        | P < 0.01 (0.004414057)  |
| M7                                                                      | M8  | 13.1      | 2        | P < 0.001 (0.001443971) |
| M8a                                                                     | M8  | 10.9      | 1        | P < 0.001 (0.000973079) |

| Table S13: CodeML results for the alignment of Plasminogen Activator, including results of all models identified in this study. |              |        |                                                  |                                                 |                                                |                                                |          |                                                                                                                                                    |
|---------------------------------------------------------------------------------------------------------------------------------|--------------|--------|--------------------------------------------------|-------------------------------------------------|------------------------------------------------|------------------------------------------------|----------|----------------------------------------------------------------------------------------------------------------------------------------------------|
| Model                                                                                                                           | Likelihood   | dN/dS  | Parameters                                       |                                                 |                                                |                                                |          | Number of sites where omega > 1*                                                                                                                   |
| M0 (Null)                                                                                                                       | -2402.641004 | 1.0549 | N/A                                              |                                                 |                                                |                                                |          | N/A                                                                                                                                                |
| M1a (Neutral)                                                                                                                   | -2376.314343 | 0.4849 | P <sub>0</sub> : 0.515<br>ω <sub>0</sub> : 0.0   |                                                 | P <sub>1</sub> : 0.485<br>ω <sub>1</sub> : 1.0 |                                                |          | N/A                                                                                                                                                |
| M2a†                                                                                                                            | -2351.136942 | 1.3046 | P <sub>0</sub> : 0.708<br>ω <sub>0</sub> : 0.163 | P <sub>1</sub> : 0.05<br>ω <sub>1</sub> : 1.0   |                                                | P <sub>2</sub> : 0.24<br>ω <sub>2</sub> : 4.74 |          | 10 (P>0.95)<br>(13, 24, 30, 133, 169, 196, 219,244, 283, 303)<br>4 (P>0.99)<br>(12, 39,107, 243)                                                   |
| M3†                                                                                                                             | -2350.557836 | 1.3338 | P <sub>0</sub> : 0.711<br>ω <sub>0</sub> : 0.139 | P <sub>1</sub> : 0.270<br>ω <sub>1</sub> : 3.73 |                                                | P <sub>2</sub> : 0.02<br>ω <sub>2</sub> : 12.3 |          | N/A                                                                                                                                                |
| M7 (beta)                                                                                                                       | -2376.357489 | 0.5000 | p: 0.00500                                       |                                                 |                                                |                                                |          | N/A                                                                                                                                                |
|                                                                                                                                 |              |        | q: 0.00500                                       |                                                 |                                                |                                                |          |                                                                                                                                                    |
| M8 (beta and ω)†                                                                                                                | -2351.139833 | 1.3082 | p <sub>0</sub> : 0.752                           | P = 23.8                                        | q = 99                                         | P <sub>1</sub> = 0.248                         | ω = 4.68 | 14 (P>0.95)<br>(24, 28, 30, 76, 77, 135, 137, 156, 169, 195, 219, 280, 298, 302)<br>10 (P>0.99)<br>(12, 13, 39, 107, 133, 218, 243, 244, 283, 303) |
| M8a†                                                                                                                            | -2376.363134 | 0.4849 | p <sub>0</sub> : 0.515                           | P = 0.005                                       | q = 1.72                                       | P <sub>1</sub> = 0.49                          | ω = 1.00 | N/A                                                                                                                                                |
| † Models that allow ω > 1 (checking for diversifying selection)<br>*identified by the Bayes Empirical Bayes (BEB) model         |              |        |                                                  |                                                 |                                                |                                                |          |                                                                                                                                                    |

| Table S14: Significance of CodeML results for the alignment of Plasminogen Activator |     |           |          |                            |
|--------------------------------------------------------------------------------------|-----|-----------|----------|----------------------------|
| Null model vs Alternative model                                                      |     | X2 result | K result | Level of significance      |
| M0                                                                                   | M3  | 104.2     | 4        | P < 0.001<br>(0.000000000) |
| M1a                                                                                  | M2a | 50.4      | 2        | P < 0.001<br>(0.000000000) |
| M7                                                                                   | M8  | 50.4      | 2        | P < 0.001<br>(0.000000000) |
| M8a                                                                                  | M8  | 125.6     | 15       | P < 0.001<br>(0.000000000) |

| Table S15: CodeML results for the alignment of Desmallipins, including results of all models identified in this study.  |              |         |                        |                      |                     |                      |          |                                                                                                                                                                 |
|-------------------------------------------------------------------------------------------------------------------------|--------------|---------|------------------------|----------------------|---------------------|----------------------|----------|-----------------------------------------------------------------------------------------------------------------------------------------------------------------|
| Model                                                                                                                   | Likelihood   | dN/dS   | Parameters             |                      |                     |                      |          | Number of sites where omega > 1*                                                                                                                                |
| M0 (Null)                                                                                                               | -2492.789614 | 1.09464 | N/A                    |                      |                     |                      |          | N/A                                                                                                                                                             |
| M1a (Neutral)                                                                                                           | -2454.891429 | 0.6265  | P0: 0.418<br>ω0: 0.11  |                      | P1: 0.582<br>ω1:1.0 |                      |          | N/A                                                                                                                                                             |
| M2a†                                                                                                                    | -2432.882104 | 1.3216  | P0: 0.347<br>ω0: 0.153 | P1: 0.398<br>ω1: 1.0 |                     | P2:0.255<br>ω2: 3.47 |          | 3 (P>0.95)<br>(15, 42, 74)<br>7 (P>0.99)<br>(1, 28, 64, 110, 146, 159, 160)                                                                                     |
| M3†                                                                                                                     | -2432.627521 | 1.3623  | P0: 0.503<br>ω0: 0.27  | P1 0.370<br>ω1: 1.78 |                     | P2:0.126<br>ω2: 4.51 |          | N/A                                                                                                                                                             |
| M7 (beta)                                                                                                               | -2458.205228 | 0.6304  | p: 0.01630             |                      |                     |                      |          | N/A                                                                                                                                                             |
|                                                                                                                         |              |         | q: 0.00896             |                      |                     |                      |          |                                                                                                                                                                 |
| M8 (beta and ω)†                                                                                                        | -2432.885088 | 1.3393  | p0: 0.725              | P = 0.420            | q = 0.321           | P1 = 0.28            | ω = 3.37 | 17 (P>0.95)<br>(2, 12, 24, 25, 27, 46, 47, 69, 78, 106, 121, 140, 152, 155, 157, 161, 164)<br>12 (P>0.99)<br>(1, 7, 15, 28, 42, 61, 64, 74, 110, 146, 159, 160) |
| M8a†                                                                                                                    | -2454.916520 | 0.6265  | p0: 0.418              | P = 11.99            | q = 99              | P1 = 0.581           | ω = 1    |                                                                                                                                                                 |
| † Models that allow ω > 1 (checking for diversifying selection)<br>*identified by the Bayes Empirical Bayes (BEB) model |              |         |                        |                      |                     |                      |          |                                                                                                                                                                 |

| Table S16: Significance of CodeML results for the alignment of Desmallipins |     |           |          |                            |
|-----------------------------------------------------------------------------|-----|-----------|----------|----------------------------|
| Null model vs Alternative model                                             |     | X2 result | K result | Level of significance      |
| M0                                                                          | M3  | 120.3     | 4        | P < 0.001<br>(0.000000000) |
| M1a                                                                         | M2a | 44        | 2        | P < 0.001<br>(0.000000000) |
| M7                                                                          | M8  | 50.6      | 2        | P < 0.001<br>(0.000000000) |
| M8a                                                                         | M8  | 44.1      | 1        | P < 0.001<br>(0.000000000) |



| Table S17: CodeML results for the alignment of PACAP, including results of all models identified in this study.         |              |         |                       |                       |                      |            |                                                        |                                                                          |
|-------------------------------------------------------------------------------------------------------------------------|--------------|---------|-----------------------|-----------------------|----------------------|------------|--------------------------------------------------------|--------------------------------------------------------------------------|
| Model                                                                                                                   | Likelihood   | dN/dS   | Parameters            |                       |                      |            |                                                        | Number of sites where omega > 1*                                         |
| M0 (Null)                                                                                                               | -1300.669556 | 0.90099 | N/A                   |                       |                      |            |                                                        | N/A                                                                      |
| M1a (Neutral)                                                                                                           | -1289.424644 | 0.5148  | P0: 0.485<br>ω0: 0.0  |                       | P1: 0.515<br>ω1:1.0  |            |                                                        | N/A                                                                      |
| M2a†                                                                                                                    | -1280.254233 | 1.3239  | P0: 0. 459<br>ω0: 0.0 | P1: 0.389<br>ω1: 1.0  | P2:0.151<br>ω2: 6.16 |            | 4 (P>0.95)<br>(4, 164, 165, 170)<br>1 (P>0.99)<br>(20) |                                                                          |
| M3†                                                                                                                     | -1280.017379 | 1.3933  | P0: 0. 545<br>ω0: 0.0 | P1: 0.376<br>ω1: 1.83 | P2:0.078<br>ω2: 8.82 |            | N/A                                                    |                                                                          |
| M7 (beta)                                                                                                               | -1289.446181 | 0.5000  | p: 0.00503            |                       |                      |            |                                                        | N/A                                                                      |
|                                                                                                                         |              |         | q: 0.00504            |                       |                      |            |                                                        |                                                                          |
| M8 (beta and ω)†                                                                                                        | -1280.298166 | 1.3208  | p0: 0.840             | P = 0.013             | q = 0.016            | P1 = 0.160 | ω = 5.96                                               | 14 (P>0.95)<br>(1, 7, 12, 13, 39, 40, 43, 66, 68, 87, 91, 100, 105, 107) |
| M8a†                                                                                                                    | -1289.424628 | 0.5148  | p0: 0.485             | P = 0.005             | q = 1.83             | P1 = 0.514 | ω = 1.00                                               | N/A                                                                      |
| † Models that allow ω > 1 (checking for diversifying selection)<br>*identified by the Bayes Empirical Bayes (BEB) model |              |         |                       |                       |                      |            |                                                        |                                                                          |

| Table S18: Significance of CodeML results for the alignment of PACAP |     |           |          |                            |
|----------------------------------------------------------------------|-----|-----------|----------|----------------------------|
| Null model vs Alternative model                                      |     | X2 result | K result | Level of significance      |
| M0                                                                   | M3  | 41.3      | 4        | P < 0.001<br>(0.000000023) |
| M1a                                                                  | M2a | 18.3      | 2        | P < 0.001<br>(0.000104074) |
| M7                                                                   | M8  | 18.3      | 2        | P < 0.001<br>(0.000106431) |
| M8a                                                                  | M8  | 18.3      | 1        | P < 0.001<br>(0.000019343) |

| Table S19: CodeML results for the alignment of CRiSP <i>Desmodus</i> , including results of all models identified in this study. |             |         |                                                 |                                                 |                                               |                                                |           |                                                             |
|----------------------------------------------------------------------------------------------------------------------------------|-------------|---------|-------------------------------------------------|-------------------------------------------------|-----------------------------------------------|------------------------------------------------|-----------|-------------------------------------------------------------|
| Model                                                                                                                            | Likelihood  | dN/dS   | Parameters                                      |                                                 |                                               |                                                |           | Number of sites where omega > 1*                            |
| M0 (Null)                                                                                                                        | -671.081776 | 1.48836 | N/A                                             |                                                 |                                               |                                                |           | N/A                                                         |
| M1a(Neutral)                                                                                                                     | -668.553921 | 0.4589  | P <sub>0</sub> : 0.541<br>ω <sub>0</sub> : 0.0  |                                                 | P <sub>1</sub> : 0.459<br>ω <sub>1</sub> :1.0 |                                                |           | N/A                                                         |
| M2a†                                                                                                                             | -660.883331 | 2.0592  | P <sub>0</sub> : 0.905<br>ω <sub>0</sub> : 0.58 | P <sub>1</sub> : 0.0<br>ω <sub>1</sub> : 1.0    |                                               | P <sub>2</sub> :0.1<br>ω <sub>2</sub> : 16.125 |           | 4 (P>0.95)<br>(7, 13, 39, 66)                               |
| M3†                                                                                                                              | -660.883331 | 1.4884  | P <sub>0</sub> : 0.760<br>ω <sub>0</sub> : 0.58 | P <sub>1</sub> : 0.145<br>ω <sub>1</sub> : 0.58 |                                               | P <sub>2</sub> :0.1<br>ω <sub>2</sub> : 16.125 |           | N/A                                                         |
| M7 (beta)                                                                                                                        | -668.591488 | 0.5000  | p: 0.00500                                      |                                                 |                                               |                                                |           | N/A                                                         |
|                                                                                                                                  |             |         | q: 0.00501                                      |                                                 |                                               |                                                |           |                                                             |
| M8 (beta and ω)†                                                                                                                 | -660.884052 | 2.0806  | p <sub>0</sub> : 0.906                          | P = 99                                          | q = 69.09                                     | P <sub>1</sub> = 0.094                         | ω = 16.36 | 4 (P>0.95)<br>(4, 164, 165, 169)<br>2 (P>0.99)<br>(20, 170) |
| M8a†                                                                                                                             | -668.553916 | 0.4589  | p <sub>0</sub> : 0.541                          | P = 0.01                                        | q = 1.1                                       | P <sub>1</sub> = 0.459                         | ω = 1     | N/A                                                         |
| † Models that allow ω > 1 (checking for diversifying selection)<br>*identified by the Bayes Empirical Bayes (BEB) model          |             |         |                                                 |                                                 |                                               |                                                |           |                                                             |

| Table S20: Significance of CodeML results for the alignment of CRiSP <i>Desmodus</i> |     |           |          |                            |
|--------------------------------------------------------------------------------------|-----|-----------|----------|----------------------------|
| Null model vs Alternative model                                                      |     | X2 result | K result | Level of significance      |
| M0                                                                                   | M3  | 20.4      | 4        | P < 0.001<br>(0.000416898) |
| M1a                                                                                  | M2a | 15.3      | 2        | P < 0.001<br>(0.000466343) |
| M7                                                                                   | M8  | 15.4      | 2        | P < 0.001<br>(0.000449472) |
| M8a                                                                                  | M8  | 15.3      | 1        | P < 0.001<br>(0.000089808) |

| Table S21: CodeML results for the alignment of CRiSP All, including results of all models identified in this study             |              |         |                                    |                                    |                                   |                                    |                  |                                                                         |
|--------------------------------------------------------------------------------------------------------------------------------|--------------|---------|------------------------------------|------------------------------------|-----------------------------------|------------------------------------|------------------|-------------------------------------------------------------------------|
| Model                                                                                                                          | Likelihood   | dN/dS   | Parameters                         |                                    |                                   |                                    |                  | Number of sites where $\omega > 1^*$                                    |
| M0 (Null)                                                                                                                      | -1031.729998 | 0.34629 | N/A                                |                                    |                                   |                                    |                  | N/A                                                                     |
| M1a (Neutral)                                                                                                                  | -1008.617620 | 0.4574  | $P_0$ : 0.568<br>$\omega_0$ : 0.04 |                                    | $P_1$ : 0.432<br>$\omega_1$ : 1.0 |                                    |                  | N/A                                                                     |
| M2a†                                                                                                                           | -1002.587333 | 1.3843  | $P_0$ : 0.574<br>$\omega_0$ : 0.05 | $P_1$ : 0.34<br>$\omega_1$ : 1.0   |                                   | $P_2$ : 0.09<br>$\omega_2$ : 11.52 |                  | 3( $P > 0.95$ )<br>(7, 13, 64)                                          |
| M3†                                                                                                                            | -1002.587333 | 1.4772  | $P_0$ : 0.598<br>$\omega_0$ : 0.06 | $P_1$ : 0.316<br>$\omega_1$ : 1.19 |                                   | $P_2$ : 0.09<br>$\omega_2$ : 12.43 |                  | N/A                                                                     |
| M7 (beta)                                                                                                                      | -1009.248073 | 0.4542  | p: 0.11168                         |                                    |                                   |                                    |                  | N/A                                                                     |
|                                                                                                                                |              |         | q: 0.13422                         |                                    |                                   |                                    |                  |                                                                         |
| M8 (beta and $\omega$ )†                                                                                                       | -1002.784971 | 1.2923  | p0: 0.91                           | P = 0.171                          | q = 0.3                           | P1 = 0.09                          | $\omega$ = 10.69 | 4 ( $P > 0.95$ )<br>(39, 66, 89, 98)<br>3 ( $P > 0.99$ )<br>(7, 13, 64) |
| M8a†                                                                                                                           | -1008.623987 | 0.4567  | p0: 0.569                          | P = 4.78                           | q = 99                            | P1 = 0.43                          | $\omega$ = 1.00  |                                                                         |
| † Models that allow $\omega > 1$ (checking for diversifying selection)<br>*identified by the Bayes Empirical Bayes (BEB) model |              |         |                                    |                                    |                                   |                                    |                  |                                                                         |

| Table S22: Significance of CodeML results for the alignment of CRiSP All |     |           |          |                            |
|--------------------------------------------------------------------------|-----|-----------|----------|----------------------------|
| Null model vs Alternative model                                          |     | X2 result | K result | Level of significance      |
| M0                                                                       | M3  | 58.3      | 4        | P < 0.001<br>(0.000000000) |
| M1a                                                                      | M2a | 12.1      | 3        | P < 0.01 (0.007178514)     |
| M7                                                                       | M8  | 12.9      | 2        | P < 0.01 (0.001559949)     |
| M8a                                                                      | M8  | 11.7      | 1        | P < 0.001<br>(0.000632424) |

| Table S23: CodeML results for the alignment of Kunitz Domain One, including results of all models identified in this study |             |         |                        |                       |                     |                      |          |                                                  |
|----------------------------------------------------------------------------------------------------------------------------|-------------|---------|------------------------|-----------------------|---------------------|----------------------|----------|--------------------------------------------------|
| Model                                                                                                                      | Likelihood  | dN/dS   | Parameters             |                       |                     |                      |          | Number of sites where omega > 1*                 |
| M0 (Null)                                                                                                                  | -686.243223 | 0.29323 | N/A                    |                       |                     |                      |          | N/A                                              |
| M1a (Neutral)                                                                                                              | -650.130441 | 0.5524  | P0: 0.455<br>ω0: 0.02  |                       | P1: 0.545<br>ω1:1.0 |                      |          | N/A                                              |
| M2a†                                                                                                                       | -647.141997 | 1.4170  | P0: 0.444<br>ω0: 0.015 | P1: 0.403<br>ω1: 1.0  |                     | P2:0.15<br>ω2: 6.56  |          | 1(P>0.99)<br>28                                  |
| M3†                                                                                                                        | -645.421643 | 1.4033  | P0: 0.384<br>ω0: 0.0   | P1: 0.304<br>ω1: 0.33 |                     | P2:0.312<br>ω2: 4.18 |          |                                                  |
| M7 (beta)                                                                                                                  | -649.398512 | 0.4602  | p: 0.13042             |                       |                     |                      |          | N/A                                              |
|                                                                                                                            |             |         | q: 0.13042             |                       |                     |                      |          |                                                  |
| M8 (beta and ω)†                                                                                                           | -646.307806 | 1.3985  | p0: 0.07               | P = 0.18              | q = 0.6             | P1 = 0.28            | ω = 4.49 | 2 (P>0.95)<br>(42, 43)<br>2 (P>0.99)<br>(28, 38) |
| M8a†                                                                                                                       | -649.149486 | 0.4661  | p0: 0.585              | P = 0.148             | q = 1.24            | P1 = 0.42            | ω = 1.00 | N/A                                              |
| † Models that allow ω > 1 (checking for diversifying selection)<br>*identified by the Bayes Empirical Bayes (BEB) model    |             |         |                        |                       |                     |                      |          |                                                  |

| Table S24: Significance of CodeML results for the alignment of Kunitz Domain One |     |           |          |                            |
|----------------------------------------------------------------------------------|-----|-----------|----------|----------------------------|
| Null model vs Alternative model                                                  |     | X2 result | K result | Level of significance      |
| M0                                                                               | M3  | 81.6      | 4        | P < 0.001<br>(0.000000000) |
| M1a                                                                              | M2a | 6         | 2        | P < 0.05 (0.050365745)     |
| M7                                                                               | M8  | 6.2       | 2        | P < 0.05 (0.045469841)     |
| M8a                                                                              | M8  | 5.9       | 1        | P < 0.05 (0.017126540)     |

| Table S25: CodeML results for the alignment of Kunitz Domain Two, including results of all models identified in this study |             |         |                       |                       |                     |                      |           |                                                             |
|----------------------------------------------------------------------------------------------------------------------------|-------------|---------|-----------------------|-----------------------|---------------------|----------------------|-----------|-------------------------------------------------------------|
| Model                                                                                                                      | Likelihood  | dN/dS   | Parameters            |                       |                     |                      |           | Number of sites where omega > 1*                            |
| M0 (Null)                                                                                                                  | -490.153926 | 2.28040 | N/A                   |                       |                     |                      |           | N/A                                                         |
| M1a (Neutral)                                                                                                              | -490.985448 | 0.7345  | P0: 0.266<br>ω0: 0.00 |                       | P1: 0.735<br>ω1:1.0 |                      |           | N/A                                                         |
| M2a†                                                                                                                       | -484.686490 | 2.6283  | P0: 0.468<br>ω0: 0.0  | P1: 0.0<br>ω1: 1.0    |                     | P2:0.532<br>ω2: 4.94 |           | 3 (P>0.95)<br>(15, 18, 52)<br>1 (P>0.99)<br>(6)             |
| M3†                                                                                                                        | -484.686490 | 2.6283  | P0: 0.468<br>ω0: 0.0  | P1: 0.366<br>ω1: 4.94 |                     | P2:0.166<br>ω2: 4.94 |           | N/A                                                         |
| M7 (beta)                                                                                                                  | -491.075889 | 0.8000  | p: 0.02008            |                       |                     |                      |           | N/A                                                         |
|                                                                                                                            |             |         | q: 0.00500            |                       |                     |                      |           |                                                             |
| M8 (beta and ω)†                                                                                                           | -484.686489 | 2.6283  | p0: 0.468             | P = 0.005             | q = 12.14           | P1 = 0.53            | ω = 4.938 | 4 (P>0.95)<br>(31, 32, 50, 52)<br>3 (P>0.99)<br>(6, 15, 18) |
| M8a†                                                                                                                       | -490.985439 | 0.7345  | p0: 0.266             | P = 0.005             | q = 1.58            | P1 = 0.735           | ω = 1.00  | N/A                                                         |
| † Models that allow ω > 1 (checking for diversifying selection)<br>*identified by the Bayes Empirical Bayes (BEB) model    |             |         |                       |                       |                     |                      |           |                                                             |

| Table S26: Significance of CodeML results for the alignment of Kunitz Domain Two |     |           |          |                            |
|----------------------------------------------------------------------------------|-----|-----------|----------|----------------------------|
| Null model vs Alternative model                                                  |     | X2 result | K result | Level of significance      |
| M0                                                                               | M3  | 10.9      | 4        | P < 0.05 (0.027305797)     |
| M1a                                                                              | M2a | 12.6      | 2        | P < 0.01 (0.001838219)     |
| M7                                                                               | M8  | 12.6      | 2        | P < 0.01 (0.001838217)     |
| M8a                                                                              | M8  | 12.6      | 1        | P < 0.001<br>(0.000386180) |

Table S27: TreeSAAP values for each alignment, including magnitude, the value and the site number corresponding to each alignment. Sites with some level of property but at a non-significant value were included as well for completeness.

| Toxin                                 | Species                                               | TreeSAAP property                        | Magnitude | Value | Site number and value                                          | Non-significant sites identified                          |
|---------------------------------------|-------------------------------------------------------|------------------------------------------|-----------|-------|----------------------------------------------------------------|-----------------------------------------------------------|
| Kallikren-1(KLK1)<br><i>Blarina</i>   | Short tailed shrew ( <i>Blarina brevicauda</i> )      | Isoelectric point                        | 8         | 4.767 | 181(3.211)                                                     | N/A                                                       |
|                                       |                                                       | Power to be at the C-terminal            | 7         | 3.849 | 88 (3.672), 90(3.398), 118 (3.254) and 200 (4.319)             | N/A                                                       |
| Kallikren-1(KLK1)<br><i>Solenodon</i> | Hispaniolan solenodon ( <i>Solenodon paradoxus</i> )  | Power to be at the middle of alpha-helix | 7         | 3.598 | 154 (3.354)                                                    | N/A                                                       |
| Kallikrein-1 (KLK1)<br>Eulipotyphla   | Short tailed shrew ( <i>Blarina brevicauda</i> )      | Hydropathy                               | 6         | 3.212 | 129(4.122), 185 (4.69) and 208 (3.583)                         | N/A                                                       |
|                                       | Hispaniolan solenodon ( <i>Solenodon paradoxus</i> )  | Power to be at the C-terminal            | 6         | 5.718 | 85 (3.101), 114(3.671), 127(3.581), 178(3.128) and 202 (4.449) | 10 (magnitude 8), 208 (magnitude 7) and 209 (magnitude 7) |
| Kallikren-1 (KLK1) All                | Short tailed shrew ( <i>Blarina brevicauda</i> )      | Hydropathy                               | 6         | 3.182 | 165(3.915) and 190 (3.7)                                       | 171 (magnitude 8)                                         |
|                                       | Hispaniolan solenodon ( <i>Solenodon paradoxus</i> )  | Power to be at the C-terminal            | 6         | 6.497 | 78 (3.601), 107 (3.1), 109 (3.718), and 184 (4.202)            | 190 (magnitude 7)                                         |
|                                       | Common Vampire Bat ( <i>Desmodus rotundus</i> )       | Power to be at the middle of alpha-helix | 7         | 3.552 | N/A                                                            | N/A                                                       |
| Plasminogen Activator                 | Hairy legged vampire bat ( <i>Diphylla ecaudata</i> ) | Isoelectric point                        | 8         | 3.672 | N/A                                                            | N/A                                                       |
|                                       | White winged vampire bat ( <i>Diaemus youngi</i> )    |                                          |           |       |                                                                |                                                           |

|                                                               |                                                    |                                     |   |       |             |                  |
|---------------------------------------------------------------|----------------------------------------------------|-------------------------------------|---|-------|-------------|------------------|
|                                                               | Common vampire bat<br>( <i>Desmodus rotundus</i> ) |                                     |   |       |             |                  |
| Desmallipins<br>(Desmodus allergen-related lipocalins)        | Common Vampire Bat<br>( <i>Desmodus rotundus</i> ) | Isoelectric point                   | 8 | 4.826 | 106 (5.322) | 42 (Magnitude 7) |
| PACAP<br>(Pituitary Adenylate Cyclase-Activating Polypeptide) | Common Vampire Bat<br>( <i>Desmodus rotundus</i> ) | N/A                                 |   |       |             |                  |
| Cysteine-rich secretory proteins (CRiSP)<br><i>Desmodus</i>   | Common Vampire Bat<br>( <i>Desmodus rotundus</i> ) | Long-range non-bonded energy        | 8 | 3.398 | 7(3.211)    | N/A              |
|                                                               |                                                    | Polar requirement                   | 7 | 3.939 | N/A         | N/A              |
| Cysteine-rich secretory proteins (CRiSP) All                  | Common Vampire Bat<br>( <i>Desmodus rotundus</i> ) | Isoelectric point                   | 8 | 3.8   | 28 (3.237)  | N/A              |
|                                                               |                                                    | Polar requirement                   | 7 | 4.326 | N/A         | N/A              |
|                                                               | Platypus<br>( <i>Ornithorhynchus anatinus</i> )    | Power to be at the C-terminal       | 6 | 5.064 | N/A         | N/A              |
| Kunitz Domain One                                             | Common Vampire Bat<br>( <i>Desmodus rotundus</i> ) | Isoelectric point                   | 7 | 4.711 | N/A         | N/A              |
|                                                               |                                                    | Partial specific volume             | 6 | 3.74  | N/A         | N/A              |
| Kunitz Domain Two                                             | Common Vampire Bat<br>( <i>Desmodus rotundus</i> ) | Normalized consensus hydrophobicity | 8 | 3.253 | N/A         | N/A              |
|                                                               |                                                    | Power to be at the N-terminal       | 6 | 3.64  | N/A         | N/A              |

Table S28: Model selection result from MEGA for maximum likelihood tree for each alignment

| Toxin                                                                               | Species                                                                                                                                                        | Model  |
|-------------------------------------------------------------------------------------|----------------------------------------------------------------------------------------------------------------------------------------------------------------|--------|
| Kallikren-1(KLK1) <i>Blarina</i>                                                    | Short tailed shrew ( <i>Blarina brevicauda</i> )                                                                                                               | T92+I  |
| Kallikren-1(KLK1) <i>Solenodon</i>                                                  | Hispaniolan solenodon ( <i>Solenodon paradoxus</i> )                                                                                                           | T92+G  |
| Kallikrein-1 (KLK1) <i>Eulipotyphla</i>                                             | Short tailed shrew ( <i>Blarina brevicauda</i> )<br>Hispaniolan solenodon ( <i>Solenodon paradoxus</i> )                                                       | T92+G  |
| Kallikren-1 (KLK1) All                                                              | Short tailed shrew ( <i>Blarina brevicauda</i> )<br>Hispaniolan solenodon ( <i>Solenodon paradoxus</i> )<br>Common Vampire Bat ( <i>Desmodus rotundus</i> )    | T92+G  |
| Plasminogen Activator                                                               | Hairy legged vampire bat ( <i>Diphylla ecaudata</i> )<br>White winged vampire bat ( <i>Diaemus youngi</i> )<br>Common vampire bat ( <i>Desmodus rotundus</i> ) | K2+G   |
| Desmallipins ( <i>Desmodus</i> allergen-related lipocalins)                         | Common Vampire Bat ( <i>Desmodus rotundus</i> )                                                                                                                | K2+G   |
| PACAP (Pituitary Adenylate Cyclase-Activating Polypeptide)                          | Common Vampire Bat ( <i>Desmodus rotundus</i> )                                                                                                                | HKY+G  |
| Cysteine-rich secretory proteins (CRiSP) <i>Desmodus</i>                            | Common Vampire Bat ( <i>Desmodus rotundus</i> )                                                                                                                | T92+G  |
| Cysteine-rich secretory proteins (CRiSP) <i>Desmodus</i> and <i>Ornithorhynchus</i> | Common Vampire Bat ( <i>Desmodus rotundus</i> )<br>Platypus ( <i>Ornithorhynchus anatinus</i> )                                                                | T92    |
| Kunitz Domain One                                                                   | Common Vampire Bat ( <i>Desmodus rotundus</i> )                                                                                                                | JC + I |
| Kunitz Domain Two                                                                   | Common Vampire Bat ( <i>Desmodus rotundus</i> )                                                                                                                | JC +G  |
